# Supplementary material
Source: Research Square preprint supplement (doi:10.21203/rs.3.rs-8813265/v1)
Supplement: Supplementary file 1 [file 36f1f3096c52d6f31709ad0a.docx]

**Table 1**. Characteristics of Included Studies

| **Author (Year)** | **Country** | **Study Design** | **Sample Size (N)** | **Mean Age (years)** | **Male (%)** | **COPD Severity** | **Sexual Dysfunction Tool** | **QoL Tool** |
| --- | --- | --- | --- | --- | --- | --- | --- | --- |
| Kaptein et al. (2008) | Netherlands | Cross-sectional | 90 | 66.2 ± 8.4 | 71.1 | GOLD II–IV | IIEF / FSFI | SGRQ |
| Pitta et al. (2006) | Brazil | Cross-sectional | 75 | 64.5 ± 7.9 | 68 | FEV₁ % predicted | Self-report | SF-36 |
| Boutou et al. (2013) | Greece | Case–control | 105 | 65.1 ± 9.2 | 74.3 | GOLD I–IV | IIEF | CAT |
| Kahraman et al. (2013) | Turkey | Cross-sectional | 60 | 63.7 ± 6.8 | 100 | Spirometry confirmed | IIEF | SF-36 |
| Fletcher et al. (2013) | UK | Cross-sectional | 120 | 67.4 ± 7.2 | 69.2 | GOLD II–IV | Self-report | EQ-5D |
| Schouten et al. (2008) | Netherlands | Cohort | 98 | 65.8 ± 8.1 | 72.4 | GOLD II–III | IIEF | SF-36 |
| Sen et al. (2014) | India | Cross-sectional | 110 | 62.9 ± 6.5 | 78.2 | GOLD II–IV | IIEF | SGRQ |
| Wang et al. (2015) | China | Cross-sectional | 132 | 64.7 ± 7.3 | 70.5 | GOLD I–IV | FSFI / IIEF | WHOQOL-BREF |
| Park et al. (2016) | South Korea | Case–control | 84 | 66.9 ± 8.6 | 73.8 | GOLD II–IV | IIEF | SF-36 |
| Ahmed et al. (2018) | Egypt | Cross-sectional | 95 | 63.1 ± 6.9 | 75.8 | GOLD II–IV | IIEF | CAT |
| Silva et al. (2019) | Portugal | Cohort | 70 | 68.3 ± 7.7 | 67.1 | GOLD III–IV | FSFI | SGRQ |
| Li et al. (2020) | China | Cross-sectional | 150 | 65.4 ± 7.1 | 71.3 | GOLD I–IV | IIEF | SF-36 |

**Table 2**. Prevalence of Sexual Dysfunction in COPD Patients

| **Study** | **Total (N)** | **SD Cases (n)** | **Prevalence (%)** |
| --- | --- | --- | --- |
| Kaptein et al. | 90 | 48 | 53.3 |
| Pitta et al. | 75 | 39 | 52 |
| Boutou et al. | 105 | 61 | 58.1 |
| Kahraman et al. | 60 | 36 | 60 |
| Sen et al. | 110 | 64 | 58.2 |
| Wang et al. | 132 | 72 | 54.5 |
| Park et al. | 84 | 45 | 53.6 |
| Ahmed et al. | 95 | 55 | 57.9 |
| Silva et al. | 70 | 43 | 61.4 |
| Li et al. | 150 | 79 | 52.7 |
| Pooled prevalence (random-effects) | – | – | 56.2% (95% CI: 52.1–60.3) |

**Table 3**. Association Between Sexual Dysfunction and Quality of Life

| **Study** | **QoL Tool** | **Effect Measure** | **Effect Size (95% CI)** | **p-value** |
| --- | --- | --- | --- | --- |
| Kaptein et al. | SGRQ | Mean Difference | −12.4 (−18.6 to −6.2) | <0.001 |
| Boutou et al. | CAT | Mean Difference | +4.6 (2.1–7.2) | <0.001 |
| Kahraman et al. | SF-36 | SMD | −0.82 (−1.30 to −0.34) | 0.002 |
| Wang et al. | WHOQOL-BREF | SMD | −0.65 (−1.01 to −0.29) | 0.001 |
| Ahmed et al. | CAT | Mean Difference | +3.9 (1.5–6.3) | 0.003 |
| **Pooled effect** | – | **SMD** | **−0.74 (−0.96 to −0.52)** | <0.001 |

**Table 4**. Subgroup Analysis of Sexual Dysfunction Prevalence

| **Subgroup** | **Studies (n)** | **Pooled Prevalence (%)** | **95% CI** | **I² (%)** |
| --- | --- | --- | --- | --- |
| Male patients | 10 | 58.7 | 54.2–63.1 | 48 |
| Female patients | 6 | 49.3 | 43.0–55.6 | 52 |
| Mild–Moderate COPD | 7 | 51.2 | 46.8–55.6 | 44 |
| Severe–Very Severe COPD | 6 | 62.9 | 57.4–68.1 | 39 |
| Asia | 5 | 55.6 | 50.3–60.8 | 46 |
| Europe | 4 | 57.1 | 51.8–62.3 | 41 |

**Table 5**. Risk of Bias Assessment

| **Study** | **Tool Used** | **Score** | **Risk of Bias** |
| --- | --- | --- | --- |
| Kaptein et al. | NOS | 9-Aug | Low |
| Pitta et al. | JBI | 9-Jul | Moderate |
| Boutou et al. | NOS | 9-Jul | Moderate |
| Kahraman et al. | JBI | 9-Jun | Moderate |
| Sen et al. | JBI | 9-Jun | Moderate |
| Wang et al. | NOS | 9-Aug | Low |
| Park et al. | NOS | 9-Jul | Moderate |
| Ahmed et al. | JBI | 9-Jun | Moderate |
| Silva et al. | NOS | 9-Jul | Moderate |
| Li et al. | JBI | 9-Aug | Low |

**Table 6**. GRADE Summary of Findings

| **Outcome** | **Studies** | **Participants** | **Effect Estimate** | **Certainty** |
| --- | --- | --- | --- | --- |
| Prevalence of sexual dysfunction | 10 | 1,191 | 56.20% | ⊕⊕⊕◯ Moderate |
| SD vs QoL | 5 | 534 | SMD −0.74 | ⊕⊕⊕◯ Moderate |
| Severe COPD subgroup | 6 | 612 | Higher prevalence | ⊕⊕◯◯ Low |
